# Supplementary material for: KRAS(G12C)–AMG 510 interaction dynamics revealed by all-atom molecular dynamics simulations
Source: PubMed Central journal article supplement (PMC7371895; doi:10.1038/s41598-020-68950-y), 2020-07-20
Supplement: 41598_2020_68950_MOESM1_ESM.pdf [file 41598_2020_68950_MOESM1_ESM.pdf]

# SUPPLEMENTARY INFORMATION

## KRAS(G12C)–AMG 510 Interaction Dynamics Revealed by All-atom Molecular Dynamics Simulations.

Tatu Pantsar<sup>1,2,\*</sup>

<sup>1</sup> Department of Pharmaceutical and Medicinal Chemistry, Institute of Pharmaceutical Sciences, Eberhard Karls University Tübingen, Tübingen, Germany

<sup>2</sup> School of Pharmacy, University of Eastern Finland, Kuopio, Finland

\* tatu.pantsar@uef.fi

### Content

|                                                                                                                              |          |
|------------------------------------------------------------------------------------------------------------------------------|----------|
| <b>Supplementary Figure S1</b> .....                                                                                         | <b>2</b> |
| 2D-depiction of observed interactions in KRAS(G12C)–AMG 510 crystal structure.                                               |          |
| <b>Supplementary Figure S2</b> .....                                                                                         | <b>2</b> |
| Interaction frequencies observed in individual simulation replicas 1–5 (A–E) of Full (M1–H166) systems.                      |          |
| <b>Supplementary Figure S3</b> .....                                                                                         | <b>3</b> |
| Interaction frequencies observed in individual simulation replicas 1–5 (A–E) of NAc (AcT2–H166) systems.                     |          |
| <b>Supplementary Figure S4</b> .....                                                                                         | <b>3</b> |
| Helical switch-II conformation that is in perpendicular orientation to $\alpha$ 2-helix is observed in many KRAS structures. |          |
| <b>Supplementary Figure S5</b> .....                                                                                         | <b>4</b> |
| MSM metastable state $S_3$ exhibits similar switch-I conformation as observed in SOS1–KRAS complex.                          |          |
| <b>Supplementary Figure S6</b> .....                                                                                         | <b>5</b> |
| Transition probabilities among the metastable states.                                                                        |          |
| <b>Supplementary Figure S7</b> .....                                                                                         | <b>6</b> |
| Validation of Markov State Model.                                                                                            |          |

PDB ID: 6oim

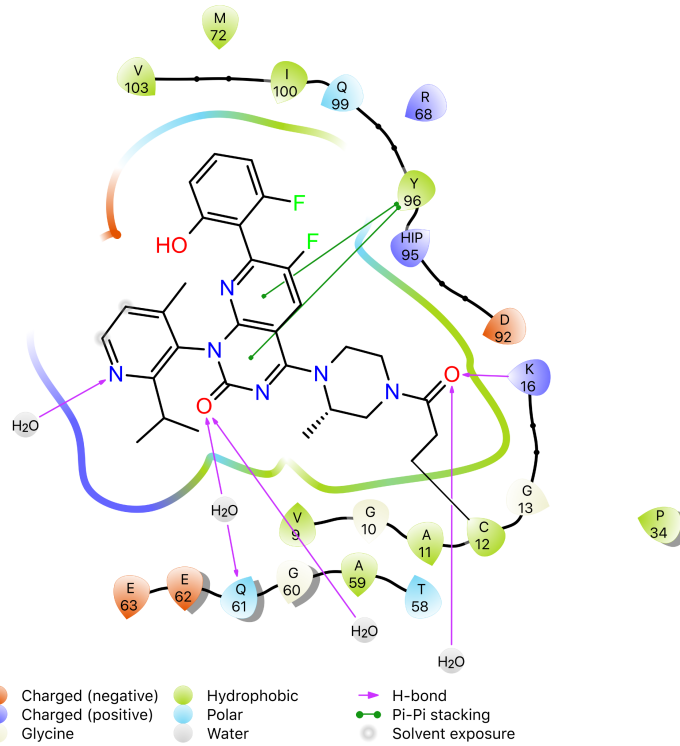

**Supplementary Figure S1. 2D-depiction of observed interactions in KRAS(G12C)–AMG 510 crystal structure (PDB ID: 6oim).**

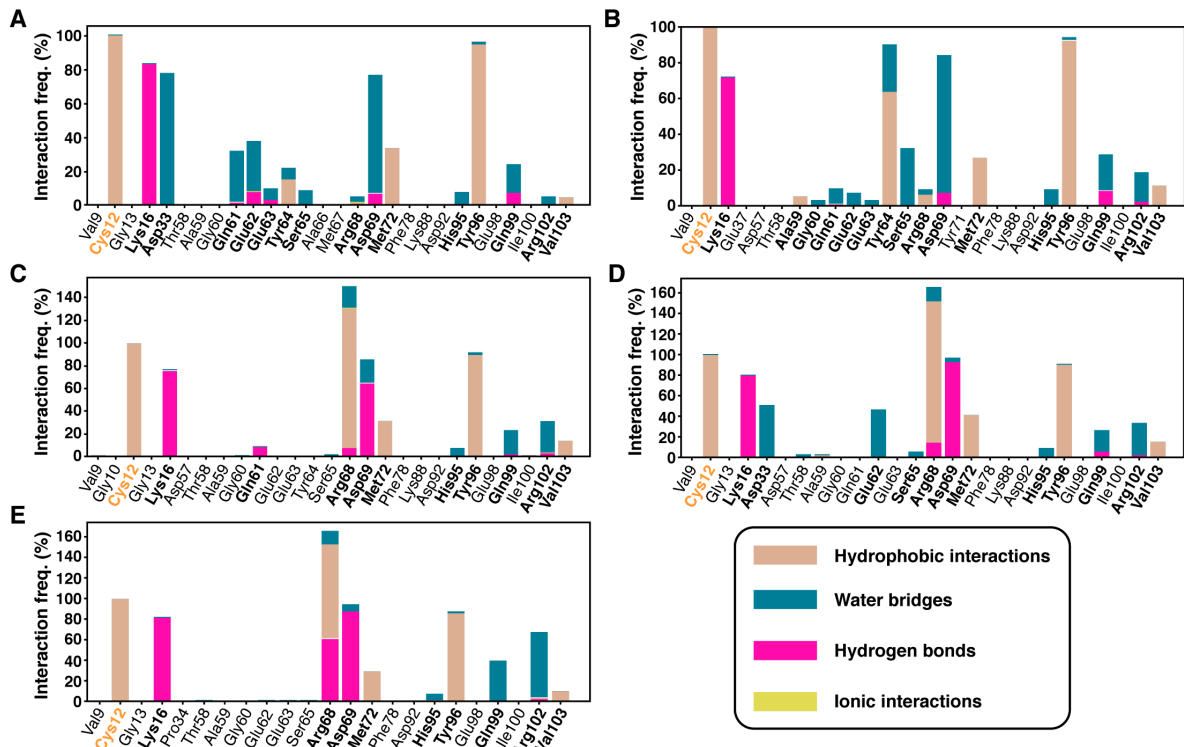

**Supplementary Figure S2. Interaction frequencies observed in individual simulation replicas 1–5 (A–E) of Full (M1–H166) systems. Each replica consists of 10  $\mu$ s MD simulation data.**

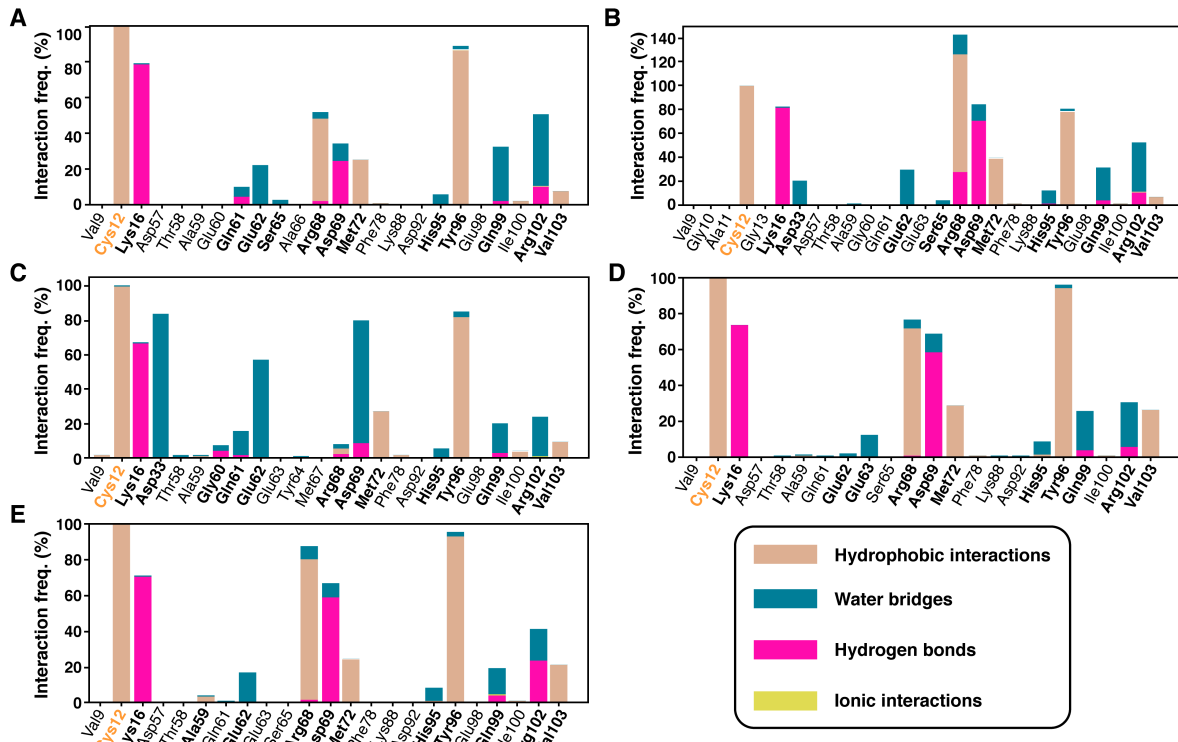

**Supplementary Figure S3. Interaction frequencies observed in individual simulation replicas 1–5 (A–E) of NAc (Act2–H166) systems.** Each replica consists of 5  $\mu$ s MD simulation data.

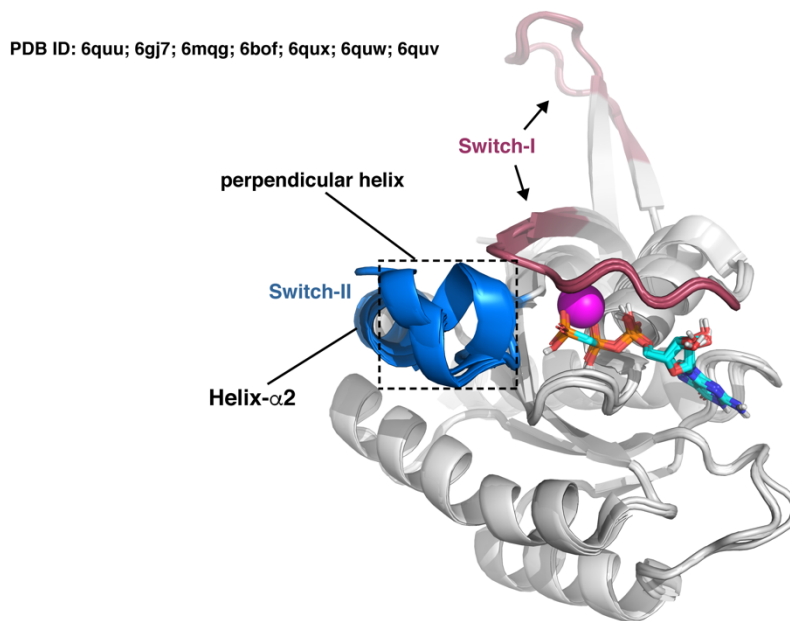

**Supplementary Figure S4. Helical switch-II conformation that is in perpendicular orientation to  $\alpha$ 2-helix is observed in many KRAS structures (PDB IDs: 6quu; 6gj7; 6mqg; 6bof; 6qux; 6quw; 6quv).**

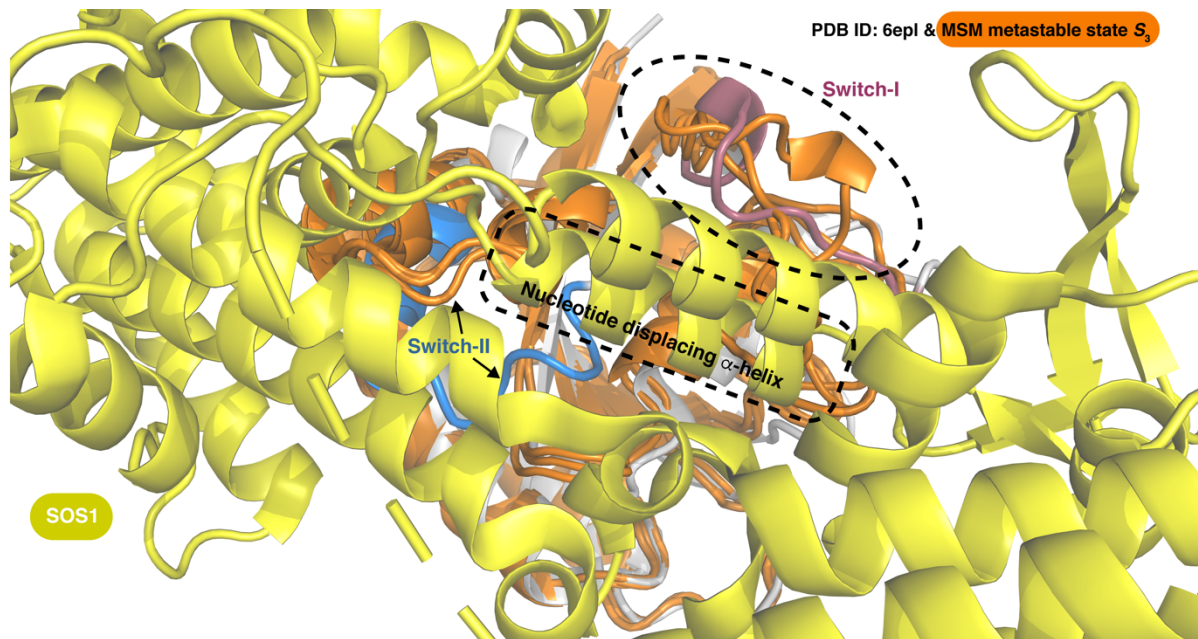

**Supplementary Figure S5. MSM metastable state  $S_3$  exhibits similar switch-I conformation as observed in SOS1–KRAS complex.** KRAS from the SOS1–KRAS complex (PDB ID: 6ep1) is illustrated in grey cartoon with switch-I and switch-II in red and blue, respectively. SOS1 is shown in yellow cartoon. Three conformations of  $S_3$  are illustrated with orange cartoon.

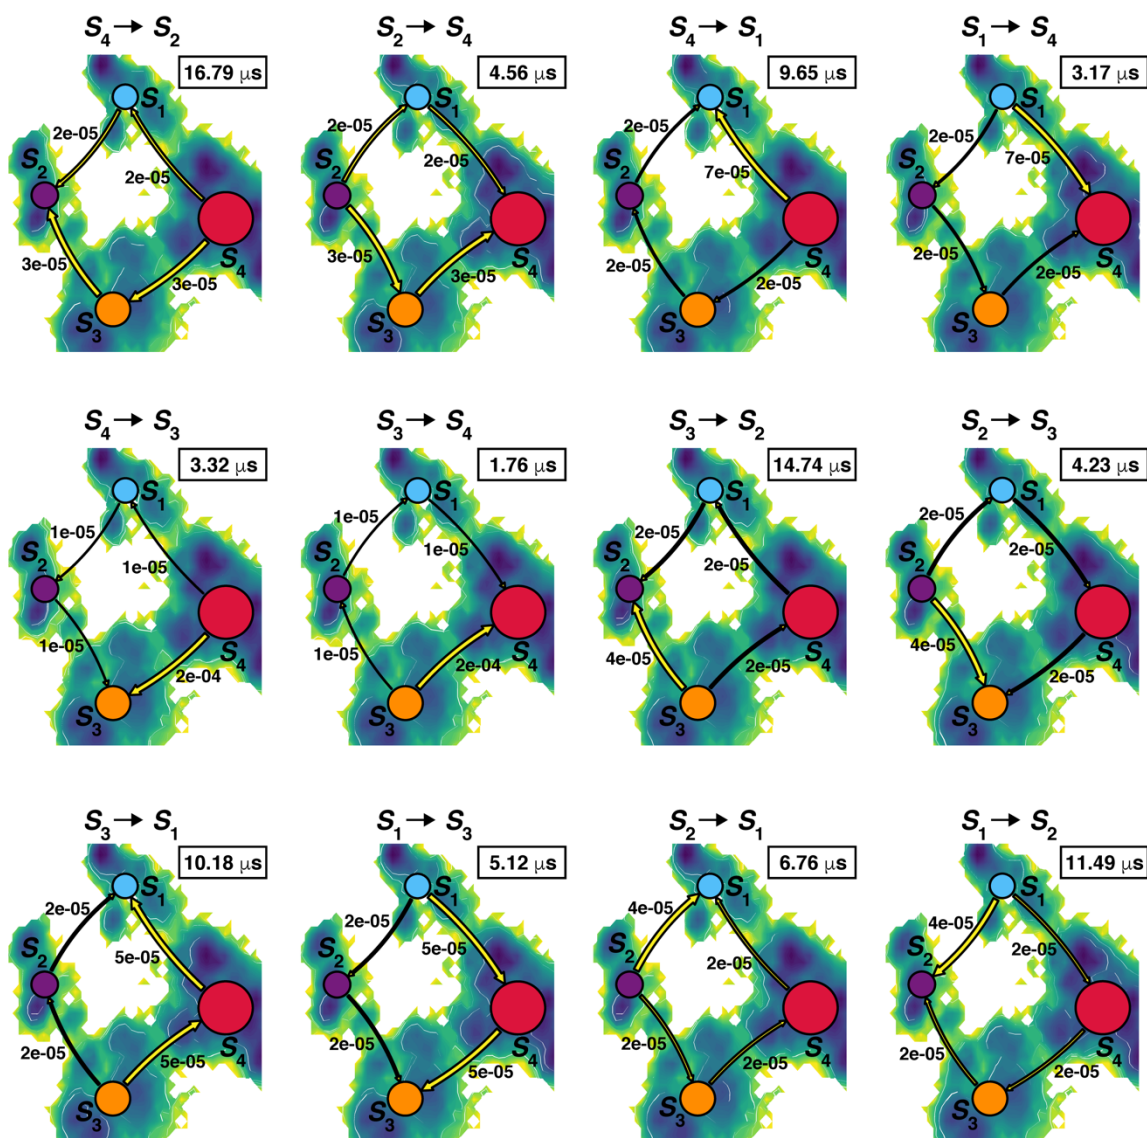

**Supplementary Figure S6. Transition probabilities among the metastable states.** Conformational change pathways probability flux for each state transition based on transition pathway theory. Mean-first-passage-time of transition is shown for each flux and varies between 1.76  $\mu\text{s}$  and 16.79  $\mu\text{s}$ .

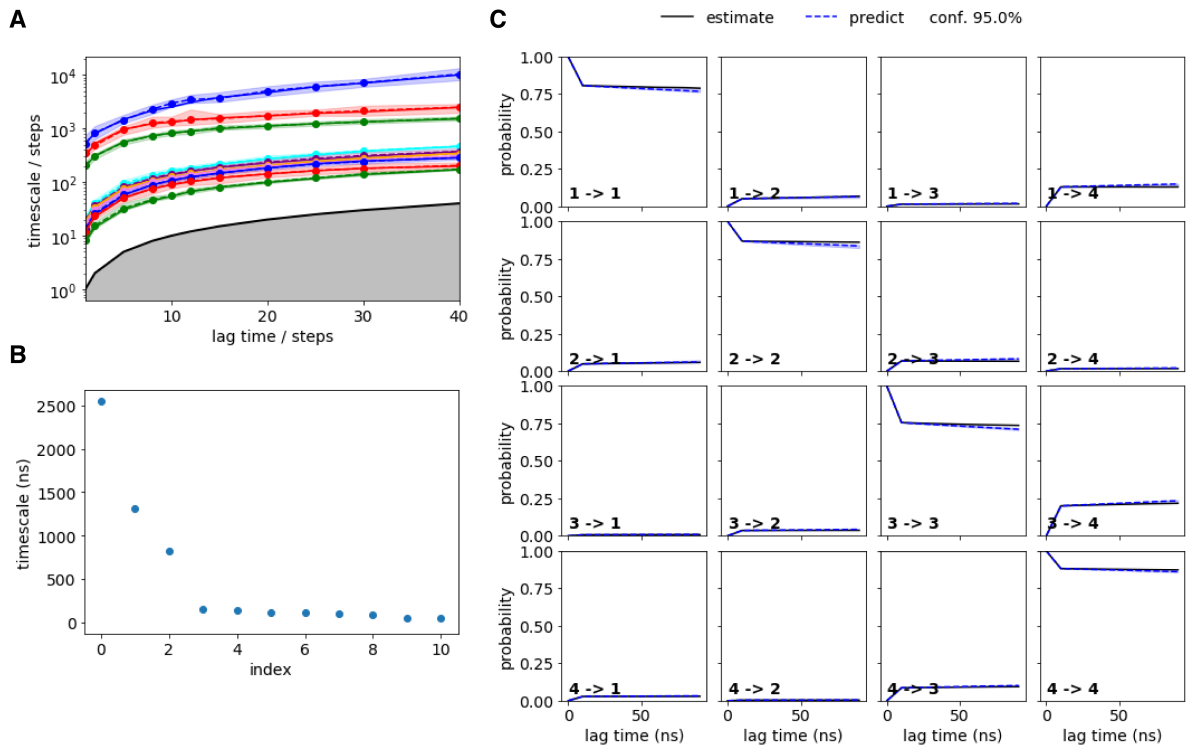

**Supplementary Figure S7. Validation of Markov state model.** (A) Implied relaxation timescales indicate that selected lag time ( $\tau = 10$  ns) is suitable. (B) Spectrum of relaxation timescales at  $\tau = 10$  ns. A clear separation is observed between the third and fourth slowest relaxation times, suggesting a four-state model. (C) Chapman-Kolmogorov test of the model indicate accurate prediction of the behaviour on longer timescales.
